RESEARCH ARTICLE

# Patterns and temporal trends of comorbidity among adult patients with incident cardiovascular disease in the UK between 2000 and 2014: A population-based cohort study

Jenny Tran<sup>1,2</sup>, Robyn Norton<sup>1,3</sup>, Nathalie Conrad<sup>1</sup>, Fatemeh Rahimian<sup>1,2</sup>, Dexter Canoy<sup>1,2</sup>, Milad Nazarzadeh<sup>1,4</sup>, Kazem Rahimi<sup>1,2,5\*</sup>

**1** George Institute for Global Health, University of Oxford, Oxford, United Kingdom, **2** Deep Medicine, Oxford Martin School, Oxford, United Kingdom, **3** George Institute for Global Health, University of New South Wales, Sydney, New South Wales, Australia, **4** Collaboration Center of Meta-Analysis Research, Torbat Heydariyeh University of Medical Sciences, Torbat Heydariyeh, Iran, **5** Oxford University Hospitals NHS Foundation Trust, Oxford, United Kingdom

\* [kazem.rahimi@georgeinstitute.ox.ac.uk](mailto:kazem.rahimi@georgeinstitute.ox.ac.uk)

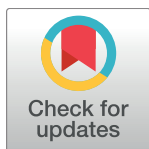

**OPEN ACCESS**

**Citation:** Tran J, Norton R, Conrad N, Rahimian F, Canoy D, Nazarzadeh M, et al. (2018) Patterns and temporal trends of comorbidity among adult patients with incident cardiovascular disease in the UK between 2000 and 2014: A population-based cohort study. *PLoS Med* 15(3): e1002513. <https://doi.org/10.1371/journal.pmed.1002513>

**Academic Editor:** Carolyn S. P. Lam, National University of Singapore, SINGAPORE

**Received:** October 14, 2017

**Accepted:** January 23, 2018

**Published:** March 6, 2018

**Copyright:** © 2018 Tran et al. This is an open access article distributed under the terms of the [Creative Commons Attribution License](https://creativecommons.org/licenses/by/4.0/), which permits unrestricted use, distribution, and reproduction in any medium, provided the original author and source are credited.

**Data Availability Statement:** Data are available from the the CPRD (<https://www.cprd.com/home/>) for researchers who meet the criteria for access to confidential data.

**Funding:** This work was supported by grants from the Oxford Martin School and the National Institute for Health Research Oxford Biomedical Research Centre. The funders had no role in study design, data collection and analysis, decision to publish, or preparation of the manuscript.

## Abstract

### Background

Multimorbidity in people with cardiovascular disease (CVD) is common, but large-scale contemporary reports of patterns and trends in patients with incident CVD are limited. We investigated the burden of comorbidities in patients with incident CVD, how it changed between 2000 and 2014, and how it varied by age, sex, and socioeconomic status (SES).

### Methods and findings

We used the UK Clinical Practice Research Datalink with linkage to Hospital Episode Statistics, a population-based dataset from 674 UK general practices covering approximately 7% of the current UK population. We estimated crude and age/sex-standardised (to the 2013 European Standard Population) prevalence and 95% confidence intervals for 56 major comorbidities in individuals with incident non-fatal CVD. We further assessed temporal trends and patterns by age, sex, and SES groups, between 2000 and 2014. Among a total of 4,198,039 people aged 16 to 113 years, 229,205 incident cases of non-fatal CVD, defined as first diagnosis of ischaemic heart disease, stroke, or transient ischaemic attack, were identified. Although the age/sex-standardised incidence of CVD decreased by 34% between 2000 to 2014, the proportion of CVD patients with higher numbers of comorbidities increased. The prevalence of having 5 or more comorbidities increased 4-fold, rising from 6.3% (95% CI 5.6%–17.0%) in 2000 to 24.3% (22.1%–34.8%) in 2014 in age/sex-standardised models. The most common comorbidities in age/sex-standardised models were hypertension (28.9% [95% CI 27.7%–31.4%]), depression (23.0% [21.3%–26.0%]), arthritis (20.9% [19.5%–23.5%]), asthma (17.7% [15.8%–20.8%]), and anxiety (15.0% [13.7%–

**Competing interests:** KR receives a stipend as a specialty consulting editor for PLOS Medicine and serves on the journal's editorial board. KR also served as a guest editor on PLOS Medicine's Cardiovascular Disease Special Issue.

**Abbreviations:** BMI, body mass index; CPRD, Clinical Practice Research Datalink; CVD, cardiovascular disease; DBP, diastolic blood pressure; HES, Hospital Episode Statistics; IHD, ischaemic heart disease; IMD, Index of Multiple Deprivation; QOF, Quality and Outcomes Framework; SBP, systolic blood pressure; SES, socioeconomic status; TIA, transient ischaemic attack.

17.6%]). Cardiometabolic conditions and arthritis were highly prevalent among patients aged over 40 years, and mental illnesses were highly prevalent in patients aged 30–59 years. The age-standardised prevalence of having 5 or more comorbidities was 19.1% (95% CI 17.2%–22.7%) in women and 12.5% (12.0%–13.9%) in men, and women had twice the age-standardised prevalence of depression (31.1% [28.3%–35.5%] versus 15.0% [14.3%–16.5%]) and anxiety (19.6% [17.6%–23.3%] versus 10.4% [9.8%–11.8%]). The prevalence of depression was 46% higher in the most deprived fifth of SES compared with the least deprived fifth (age/sex-standardised prevalence of 38.4% [31.2%–62.0%] versus 26.3% [23.1%–34.5%], respectively). This is a descriptive study of routine electronic health records in the UK, which might underestimate the true prevalence of diseases.

## Conclusions

The burden of multimorbidity and comorbidity in patients with incident non-fatal CVD increased between 2000 and 2014. On average, older patients, women, and socioeconomically deprived groups had higher numbers of comorbidities, but the type of comorbidities varied by age and sex. Cardiometabolic conditions contributed substantially to the burden, but 4 out of the 10 top comorbidities were non-cardiometabolic. The current single-disease paradigm in CVD management needs to broaden and incorporate the large and increasing burden of comorbidities.

## Author summary

### Why was this study done?

- Multimorbidity is common and has been shown to relate to a range of determinants including age, sex, and socioeconomic status in the general population.
- However, in patients with cardiovascular disease (CVD), reliable, large-scale, contemporary evidence on patterns and trends of multimorbidity is limited.
- Indeed, prior research has mainly investigated comorbidities in patients with prevalent CVD, which might be subject to time-dependent biases.

### What did the researchers do and find?

- We describe the prevalence of 56 clinically important and common comorbidities in 229,205 patients with newly diagnosed non-fatal CVD from 4.2 million patient electronic health records in the United Kingdom between 2000 and 2014.
- We show that even in age-standardised models, the proportion of patients with 5 or more conditions has increased by 4 times between 2000 and 2014.
- Although cardiometabolic conditions contributed substantially to this burden, 4 out of the 10 top comorbidities were non-cardiometabolic.
- On average, older patients, women, and socially deprived groups had higher numbers of comorbidities, but the type of comorbidities varied by age and sex.

### What do these findings mean?

- This comprehensive analysis of patterns and temporal trends in comorbidities shows that in parallel to the decreasing CVD incidence, the profile of patients is changing rapidly.
- The findings suggest that the clinical care of patients with incident CVD is becoming more complex and very different from what has been typically assessed in trial populations.
- Overall, they challenge the current single-disease paradigm in CVD management and call for incorporation of the large and increasing burden of comorbidities in research and care planning.

## Introduction

Comorbidities, defined as the presence of additional diseases with reference to an index disease [1], are associated with functional impairment and poor prognosis for the individuals affected. They also have important implications for health policy and healthcare provision as they can lead to higher hospital admission rates, longer in-hospital stays, more complications, and, consequently, higher resource utilisation [2,3].

Over the past few decades, an unprecedented decline in cardiovascular disease (CVD) incidence and mortality has been observed [4]. However, with increasing life expectancy and higher survival rates, there is an expectation that individuals with incident CVD will have multimorbidity, commonly defined as the presence of 2 or more conditions in the same individual [5], that will affect their well-being, healthcare preferences, and treatment options.

Despite the importance of this issue, to our knowledge, no previous study has investigated the patterns and temporal trends in comorbidity among incident CVD patients, and reports of the presence of comorbidities among patients with prevalent CVD have been typically confined to investigation of a few chronic conditions [6,7], limited to specific subgroups [8,9], or based on information from hospital admissions, which may miss reports on important outpatient diagnoses [10,11].

We, therefore, used a large longitudinal database of linked electronic health records to investigate the burden of comorbidity in patients with incident non-fatal CVD, defined as a diagnosis of ischaemic heart disease (IHD), stroke, or transient ischaemic attack (TIA). We extracted information for 56 major comorbid chronic conditions in these patients and investigated how their prevalence has changed over the past 15 years and how they varied by age, sex, and socioeconomic status (SES). We further compared crude and age/sex-standardised prevalence in order to gain a better understanding of how any observed differences in comorbidity patterns might be due to population ageing versus other factors.

## Methods

### Data source

The study was conducted using linked electronic health records from the UK Clinical Practice Research Datalink (CPRD) study from its inception in 1 January 1985 to 30 September 2015 (<https://www.cprd.com/home/>). The CPRD database contains pseudo-anonymised patient

data from 674 general practices in the UK, covering approximately 7% of the current UK population, and it is broadly representative of the UK population by age, sex, and ethnicity [12]. It links primary care records with discharge diagnoses from Hospital Episode Statistics (HES) and mortality data from national death registries (Office for National Statistics), with a coding system equivalent to the World Health Organization 10th revision of the International Statistical Classification of Diseases (ICD-10) [13]. The dataset is one of the most comprehensive prospective primary care databases, the validity of which has previously been reviewed elsewhere [14,15]. Scientific approval for this study was given by the CPRD Independent Scientific Advisory Committee (protocol number 16\_049R), and no additional informed consent was required as there was no individual patient involvement [16].

### Study population

We identified patients who had a first diagnosis of incident non-fatal CVD defined as any report of IHD (including acute myocardial infarction and angina), stroke, or TIA recorded between 1 January 2000 and 31 December 2014 in CPRD or HES, so long as the patient had at least 12 months of registration at the practice, the diagnosis was made after the first 12 months of their current registration period [17], the practice was deemed to be contributing 'up-to-standard' data, the patient was 16 years old or older, the patient's individual record was marked by CPRD to be 'acceptable' quality data for research purposes, and the patient's CPRD record had linkage to HES. Prevalent CVD cases were excluded by excluding patients for whom a CVD diagnosis was recorded before the patient was eligible for inclusion in the study. We restricted incident CVD events to those that were non-fatal because we were interested in the comorbidity burden in patients who continue to live after an incident CVD event.

### Selection and definition of comorbidities

We selected 56 comorbidities that are considered clinically significant and are most prevalent in the UK (Table 1). The comorbidities were selected based on 3 sources: (1) the Quality and Outcomes Framework (QOF), an incentive scheme for general practitioners in the UK [18], (2) the Charlson comorbidity index, the most commonly used comorbidity index, originally designed to predict inpatient hospital mortality [19], and (3) the multiple chronic conditions list of the US Department of Health and Human Services Initiative on Multiple Chronic Conditions [20]. For each comorbidity, a list of diagnostic codes from hospital (ICD-10) and primary care (Read) coding schemes was used to identify diagnoses. The codes were compiled from online code repositories, including Cardiovascular Disease Research Using Linked Bespoke Studies and Electronic Health Records (CALIBER) [21], and medical dictionary keyword searches (S1 Table). Diagnosis of a prevalent comorbidity was defined as the recording of a diagnostic code for that comorbidity before the date of CVD incidence. We did not include diagnoses after the date of diagnosis of CVD.

### Statistical analyses

Baseline characteristics (systolic blood pressure [SBP] and diastolic blood pressure [DBP], smoking status, and body mass index [BMI]) for patients with incident CVD were taken as the most recent measurements taken before diagnosis of CVD. BMI was stratified into 'underweight' ( $<18.5 \text{ kg/m}^2$ ), 'normal' ( $18.5\text{--}24.9 \text{ kg/m}^2$ ), 'overweight' ( $25\text{--}29.9 \text{ kg/m}^2$ ), and 'obese' ( $\geq 30 \text{ kg/m}^2$ ). We also extracted data on age, sex, SES (refer to below), and ethnicity. Results are presented as frequencies and percentages for categorical data, and means and standard deviations for continuous data, stratified by sex and SES (using fifths of the Index of Multiple Deprivation [IMD]) for all CVD patients. The key variables age, sex, and SES had complete data.

**Table 1. Comorbidities selected.**

| Group                                 | Comorbidity                  | Included conditions                                                                                                                                                                                                                                                                                                                        |
|---------------------------------------|------------------------------|--------------------------------------------------------------------------------------------------------------------------------------------------------------------------------------------------------------------------------------------------------------------------------------------------------------------------------------------|
| Cardiometabolic                       | Cardiac arrhythmia           | Cardiac arrhythmias and dysrhythmias, including atrial fibrillation and flutter, paroxysmal tachycardia, atrioventricular blocks, and other conduction disorders                                                                                                                                                                           |
|                                       | Chronic kidney disease       | Chronic kidney disease stage 3 or more, or dependence on transplant or dialysis                                                                                                                                                                                                                                                            |
|                                       | Diabetes mellitus            | Includes type I and II, and diabetes-specific sequelae                                                                                                                                                                                                                                                                                     |
|                                       | Heart failure                |                                                                                                                                                                                                                                                                                                                                            |
|                                       | Hyperlipidaemia              |                                                                                                                                                                                                                                                                                                                                            |
|                                       | Hypertension                 | Includes hypertensive-specific sequelae                                                                                                                                                                                                                                                                                                    |
|                                       | Obesity                      |                                                                                                                                                                                                                                                                                                                                            |
|                                       | Peripheral arterial disease  | Includes aortic aneurysm and dissection, embolism and thrombosis, and unspecified peripheral vascular diseases                                                                                                                                                                                                                             |
| Mental health                         | Adjustment disorder          | Includes pathological reactions to severe stress                                                                                                                                                                                                                                                                                           |
|                                       | Affective disorder           | Unspecified, persistent, or other affective disorders                                                                                                                                                                                                                                                                                      |
|                                       | Anxiety                      | Anxiety and phobic disorders                                                                                                                                                                                                                                                                                                               |
|                                       | Bipolar disorder             |                                                                                                                                                                                                                                                                                                                                            |
|                                       | Depression                   | Depression and depressive mood disorders                                                                                                                                                                                                                                                                                                   |
|                                       | Eating disorder              | Eating disorders, including bulimia and anorexia nervosa                                                                                                                                                                                                                                                                                   |
|                                       | Psychoses                    | Psychotic and delusional disorders                                                                                                                                                                                                                                                                                                         |
|                                       | Schizophrenia                |                                                                                                                                                                                                                                                                                                                                            |
|                                       | Substance abuse              | Mental and behavioural disorders due to substances including alcohol, opioids, and cannabinoids                                                                                                                                                                                                                                            |
|                                       | Respiratory                  | Asthma                                                                                                                                                                                                                                                                                                                                     |
| Chronic obstructive pulmonary disease |                              |                                                                                                                                                                                                                                                                                                                                            |
| Lung cancer                           |                              |                                                                                                                                                                                                                                                                                                                                            |
| Other respiratory cancer              |                              | Respiratory organ cancer excluding lung cancer, e.g., laryngeal cancer, pleural cancer, and tracheal cancer                                                                                                                                                                                                                                |
| Musculoskeletal                       | Arthritis                    | Chronic arthritis, including osteoarthritis, secondary arthritides (e.g., arthropathy in Crohn disease and psoriatic arthritis), and other unspecified arthritides and sequelae; excluding acute arthritis (e.g., septic arthritis) and arthritides covered elsewhere: gout, rheumatoid arthritis, and connective-tissue-related arthritis |
|                                       | Gout                         |                                                                                                                                                                                                                                                                                                                                            |
|                                       | Osteoporosis                 |                                                                                                                                                                                                                                                                                                                                            |
|                                       | Rheumatoid arthritis         |                                                                                                                                                                                                                                                                                                                                            |
| Neurological                          | Dementia                     | Includes Alzheimer disease, vascular dementia, and unspecified dementia                                                                                                                                                                                                                                                                    |
|                                       | Epilepsy                     |                                                                                                                                                                                                                                                                                                                                            |
|                                       | Hemiplegia                   |                                                                                                                                                                                                                                                                                                                                            |
|                                       | Learning disability          | Disorders of psychological development, mental retardation, and childhood autism                                                                                                                                                                                                                                                           |
| Cancers                               | Bladder cancer               |                                                                                                                                                                                                                                                                                                                                            |
|                                       | Breast cancer                |                                                                                                                                                                                                                                                                                                                                            |
|                                       | Cervical cancer              |                                                                                                                                                                                                                                                                                                                                            |
|                                       | Colon cancer                 |                                                                                                                                                                                                                                                                                                                                            |
|                                       | Ear, nose, and throat cancer |                                                                                                                                                                                                                                                                                                                                            |
|                                       | Leukaemia                    |                                                                                                                                                                                                                                                                                                                                            |
|                                       | Liver cancer                 |                                                                                                                                                                                                                                                                                                                                            |
|                                       | Lymphoma                     |                                                                                                                                                                                                                                                                                                                                            |
|                                       | Metastatic cancer            |                                                                                                                                                                                                                                                                                                                                            |
|                                       | Oesophageal cancer           |                                                                                                                                                                                                                                                                                                                                            |
|                                       | Ovarian cancer               |                                                                                                                                                                                                                                                                                                                                            |
|                                       | Pancreatic cancer            |                                                                                                                                                                                                                                                                                                                                            |
|                                       | Prostate cancer              |                                                                                                                                                                                                                                                                                                                                            |
|                                       | Rectal cancer                |                                                                                                                                                                                                                                                                                                                                            |
| Renal cancer                          |                              |                                                                                                                                                                                                                                                                                                                                            |

(Continued)

Table 1. (Continued)

| Group | Comorbidity                      | Included conditions                                                                                                                                                             |
|-------|----------------------------------|---------------------------------------------------------------------------------------------------------------------------------------------------------------------------------|
|       | Skin cancer                      |                                                                                                                                                                                 |
|       | Stomach cancer                   |                                                                                                                                                                                 |
|       | Other female reproductive cancer | Female reproductive organ cancer excluding breast, ovarian, and cervical cancer, e.g., endometrial cancer, uterine cancer, and cancer of the vagina                             |
|       | Other gastrointestinal cancer    | Gastrointestinal cancer excluding oesophageal, stomach/gastric, colon, rectal, pancreatic, and liver cancer, e.g., cancer of the bile ducts, anal cancer, and peritoneal cancer |
|       | Other male reproductive cancer   | Male reproductive organ cancer excluding prostate cancer, e.g., testicular cancer                                                                                               |
|       | Other urological cancer          | Urological organ cancer excluding renal/kidney and bladder cancer, e.g., cancer of the ureter and cancer of the urethra                                                         |
|       | Unspecified cancer               | Cancer with unspecified anatomical region or origin                                                                                                                             |
|       | Other cancer                     | Cancer not otherwise covered by all other cancers covered in the list of 56 comorbidities, e.g., brain cancer, cancer of the eye, and cancer of the endocrine glands            |
| Other | Connective tissue disease        | Systemic connective tissue disorders including systemic lupus erythematosus, systemic sclerosis, and polymyositis                                                               |
|       | HIV/AIDS                         |                                                                                                                                                                                 |
|       | Liver disease                    | Includes cirrhosis, portal hypertension, and hepatic failure; excludes liver cancer                                                                                             |
|       | Peptic ulcer disease             | Includes gastric and duodenal ulcers                                                                                                                                            |

Cancers exclude benign cancers. A comprehensive definition of each condition based on ICD-10 diagnostic codes is provided in [S1 Table](#).

<https://doi.org/10.1371/journal.pmed.1002513.t001>

SES was categorised into fifths using the IMD 2015 split by even quintiles; this categorisation is widely used in the UK in healthcare research [22,23]. The IMD is a measure of SES that uses small area boundaries covering approximately 1,500 people to calculate a deprivation score that covers 7 broad dimensions of deprivation: income, employment, education, health, crime, housing, and living environment [24].

Annual incidence rates for IHD, cerebrovascular disease (stroke/TIA), and overall CVD were calculated by dividing the number of incident cases by the number of patient-years at risk in the cohort for the year of interest. Time at risk for each patient was restricted to start from the latest of the following: the start of the year, date of current registration with the practice, or the practice's up-to-standard date, and was specified to finish at the earliest of the following: the end of the year, date of death, date of transfer out of practice, or the practice's last date of data collection.

Prevalence for each comorbidity was calculated by dividing the number of incident CVD cases with that comorbidity by the number of all patients diagnosed with CVD meeting the study inclusion criteria. Annual prevalence included all cases with a diagnosis recorded by 1 July of the year of interest. The number of comorbidities per patient was reported in categories of 0, 1, 2, 3, 4, and >5. Additionally, we classified patients as multimorbid versus not by defining multimorbidity as the presence of 1 or more comorbidities (in addition to incident CVD) [5]. Where appropriate, age- and/or sex-standardised incidence rates and proportions were computed by applying direct age standardisation to the 2013 European Standard Population [25] using 10-year age bands up to 90+ years old, and averaging the sex-specific age-standardised values. Prevalences for sex-specific conditions—breast cancer, cervical cancer, ovarian cancer, other female reproductive cancers, prostate cancer, and other male reproductive cancers—were not sex-standardised.

Prevalences were calculated for patient groups stratified by age group (10-year age groups: <20, 20–29, 30–39, 40–49, 50–59, 60–69, 70–79, 80–89, ≥90 years), sex, SES group (fifths of deprivation index), and year. Annual prevalences were plotted and fitted using locally weighted non-parametric smoothing if necessary.

The estimated prevalence proportions are presented as percentages with 95% confidence intervals. Confidence intervals for crude prevalence were calculated using the Wilson score method for binomial proportions, which is required to make reliable comparisons between different groups. Stratification may give small numbers of events in some patient groups; therefore, the normal approximation method of calculating CIs may give unusual CIs in lower or upper bounds (such as negative values) [26]. Confidence intervals for multinomial proportions for crude prevalence were calculated using the Sison and Glaz method [27]. The chi-squared test was used to test for association between 2 proportions for categorical variables, and the 2-sample *t* test for difference between means of categorical variables.

All analyses were prospectively specified in the study protocol (S1 Text), and all statistical analyses were performed using R version 3.3.2 [28]. Reporting of this study was done in accordance with the REporting of studies Conducted using Observational Routinely collected health Data (RECORD) guidelines (S2 Text) [29].

## Results

### Baseline characteristics

From a cohort of 4,198,039 patients with 29,110,997 person-years at risk, 229,205 patients with incident non-fatal CVD were identified. The mean age at the diagnosis was 71 years (range 16 to 113 years), with the majority of patients aged between 50 and 89 years (see S1 Fig for age distribution at the time of diagnosis).

Baseline characteristics of patients overall and by sex and SES are presented in Table 2. Nearly half of the patients (48%) with incident non-fatal CVD were women, who were, on average, 6 years older than men with incident non-fatal CVD (74 versus 68 years,  $p < 0.001$ ). Women were less likely to be current smokers (19.2% versus 25.0%,  $p < 0.001$ ) and less likely to be overweight (31.8% versus 40.9%,  $p < 0.001$ ) compared to men. Compared to the least deprived fifth, patients in the most deprived fifth were more likely to be obese (34.3% versus 25.5%,  $p < 0.001$ ) and current smokers (34.0% versus 14.8%,  $p < 0.001$ ). Mean (SD) SBP and DBP was 140 (SD 22) mm Hg and 80 (SD 12) mm Hg, respectively, and blood pressure varied little between sexes and across SES categories. Patients with incident cerebrovascular disease, compared to incident IHD, were older (73.7 versus 68.7 years old), were more likely to be female (55.5% versus 43.8%), and had higher blood pressure (mean SBP 142.2 mm Hg versus 139.8 mm Hg).

### Temporal trends in incidence of CVD

In 2000, age/sex-standardised incidence of non-fatal CVD was 1,109 (95% CI 1,082–1,136) per 100,000 person-years, but fell to 737 (718–754) per 100,000 person-years in 2014, a relative reduction of 34% over this 15-year period (Fig 1). A similar pattern was seen for incidence of IHD and stroke/TIA, although the reduction in incidence rate for stroke/TIA appeared to be less steep than that for IHD. Mean age at diagnosis of non-fatal CVD remained stable between 70 and 71 years between 2000 and 2014 (70.7 years in 2000, 70.5 years in 2014), and the 6-year age difference between men and women was maintained (S2 Table). Men had a higher incidence of overall CVD (and IHD and stroke/TIA) than women, and the sex difference remained relatively constant over time (S2 Fig).

### Prevalence of multimorbidity and number of comorbidities

In patients with incident CVD, the crude and age/sex-standardised prevalence of multimorbidity (defined as 1 or more comorbidities in addition to the index CVD condition) were 91.0% (95% CI 90.9%–91.1%) and 81.1% (78.7%–83.8%), respectively. For having 5 or more

Table 2. Baseline characteristics of patients with CVD at time of diagnosis.

| Characteristics                                        | All CVD                  | CVD subtype             |                         | Sex                    |                        | SES                    |                        |
|--------------------------------------------------------|--------------------------|-------------------------|-------------------------|------------------------|------------------------|------------------------|------------------------|
|                                                        |                          | Ischaemic heart disease | Cerebrovascular disease | Women                  | Men                    | Least deprived fifth   | Most deprived fifth    |
| <b>Number of patients</b>                              | 229,205                  | 140,828                 | 88,377                  | 110,803                | 118,402                | 48,801                 | 37,964                 |
| <b>Age (years), mean (SD)</b>                          | 70.6 (13.8)              | 68.7 (13.4)             | 73.7 (14.0)             | 73.8 (13.6)            | 67.6 (13.3)            | 71.5 (13.3)            | 68.4 (14.5)            |
| <b>Women, percent (n)</b>                              | 48.3 (110,803)           | 43.8 (61,733)           | 55.5 (43,428)           | 100 (110,803)          | —                      | 46.8 (22,854)          | 49.8 (18,906)          |
| <b>White ethnicity, percent (n)</b>                    | 97.0 (113,840) [111,833] | 96.7 (70,412) [67,990]  | 97.5 (43,428) [43,843]  | 97.3 (54,507) [54,803] | 96.7 (59,333) [57,30]  | 97.8 (24,071) [24,194] | 95.5 (19,834) [17,198] |
| <b>Fifths of deprivation index, percent (n)</b>        |                          |                         |                         |                        |                        |                        |                        |
| Q1 (least deprived)                                    | 21.3 (48,801)            | 21.0 (29,504)           | 21.8 (19,297)           | 20.6 (22,852)          | 21.9 (25,949)          | 100 (48,801)           | —                      |
| Q2                                                     | 22.2 (50,786)            | 22.0 (31,044)           | 22.3 (19,742)           | 21.9 (24,278)          | 22.4 (26,508)          | —                      | —                      |
| Q3                                                     | 21.2 (48,647)            | 21.1 (29,648)           | 21.5 (18,999)           | 21.3 (23,570)          | 21.2 (25,077)          | —                      | —                      |
| Q4                                                     | 18.6 (42,672)            | 18.8 (26,491)           | 18.3 (16,181)           | 19.0 (21,034)          | 18.3 (21,638)          | —                      | —                      |
| Q5 (most deprived)                                     | 16.6 (37,964)            | 17.0 (23,949)           | 15.9 (14,015)           | 17.1 (18,906)          | 16.1 (19,058)          | —                      | 100 (37,964)           |
| <b>SBP (mm Hg), mean (SD)</b>                          | 140.7 (22) [7,189]       | 139.8 (21.4) [4,097]    | 142.2 (22.8) [3,092]    | 141.6 (22.9) [2,912]   | 139.9 (21.2) [4,270]   | 141.2 (20.9) [1,257]   | 139.8 (22.8) [1,498]   |
| <b>DBP (mm Hg), mean (SD)</b>                          | 79.6 (12.2) [7,141]      | 79.4 (12.1) [4,068]     | 79.9 (12.4) [3,073]     | 79.0 (12.1) [2,890]    | 80.2 (12.3) [4,251]    | 79.8 (12.1) [1,252]    | 79.4 (12.8) [1,482]    |
| <b>Body mass index (kg/m<sup>2</sup>), percent (n)</b> |                          |                         |                         |                        |                        |                        |                        |
| Underweight                                            | 3.4 (3,756)              | 2.6 (1,847)             | 4.9 (1,909)             | 5.1 (2,702)            | 1.8 (1,054)            | 3.2 (717)              | 3.8 (747)              |
| Normal                                                 | 30.4 (33,834)            | 27.1 (19,542)           | 36.5 (14,292)           | 33.1 (17,670)          | 27.9 (16,164)          | 32.8 (7,382)           | 28.6 (5,643)           |
| Overweight                                             | 36.6 (40,667)            | 37.6 (27,058)           | 34.7 (13,609)           | 31.8 (16,976)          | 40.9 (23,691)          | 38.6 (8,687)           | 33.3 (6,575)           |
| Obese                                                  | 29.6 (32,957) [117,991]  | 32.7 (23,574) [68,807]  | 23.9 (9,383) [49,184]   | 30.0 (15,989) [57,466] | 29.3 (16,968) [60,525] | 25.5 (5,741) [26,274]  | 34.3 (6,781) [18,218]  |
| <b>Current smokers, percent (n)</b>                    | 22.3 (33,246) [80,051]   | 22.7 (21,394) [46,458]  | 21.6 (11,852) [33,593]  | 19.2 (13,459) [40,743] | 25.0 (19,787) [39,308] | 14.8 (4,583) [17,808]  | 34.0 (8,745) [12,251]  |

The category percentages refers to complete cases. Numbers in square brackets refer to the number of patients with missing data for the relevant characteristic. SES refers to the Index of Multiple Deprivation 2015 cut by quintiles, where Q1 is the least deprived fifth and Q5 is the most deprived fifth of the population. BMI categories are ‘underweight’ (<18.5 kg/m<sup>2</sup>), ‘normal’ (18.5–24.9 kg/m<sup>2</sup>), ‘overweight’ (25–29.9 kg/m<sup>2</sup>), and ‘obese’ (≥30 kg/m<sup>2</sup>).

CVD, cardiovascular disease; DBP, diastolic blood pressure; SES, socioeconomic status; SBP, systolic blood pressure.

<https://doi.org/10.1371/journal.pmed.1002513.t002>

conditions, the crude and age/sex-standardised prevalences were 25.3% (25.1%–25.5%) and 15.0% (14.3%–16.1%), respectively (S3 Table).

There was an increasing number of comorbidities in incident CVD patients from 2000 to 2014 (Fig 2; S3 Table). Crude prevalence of having 5 or more comorbidities increased by 2.9-fold from 10.6% (95% CI 9.7%–11.4%) in 2000 to 40.9% (39.9%–41.8%) in 2014. Similarly, in age/sex-standardised analysis, there was a 2.8-fold increase, from 6.3% (95% CI 5.6%–17.0%) in 2000 to 24.3% (22.1%–34.8%) in 2014. Within the group of patients with 5 or more



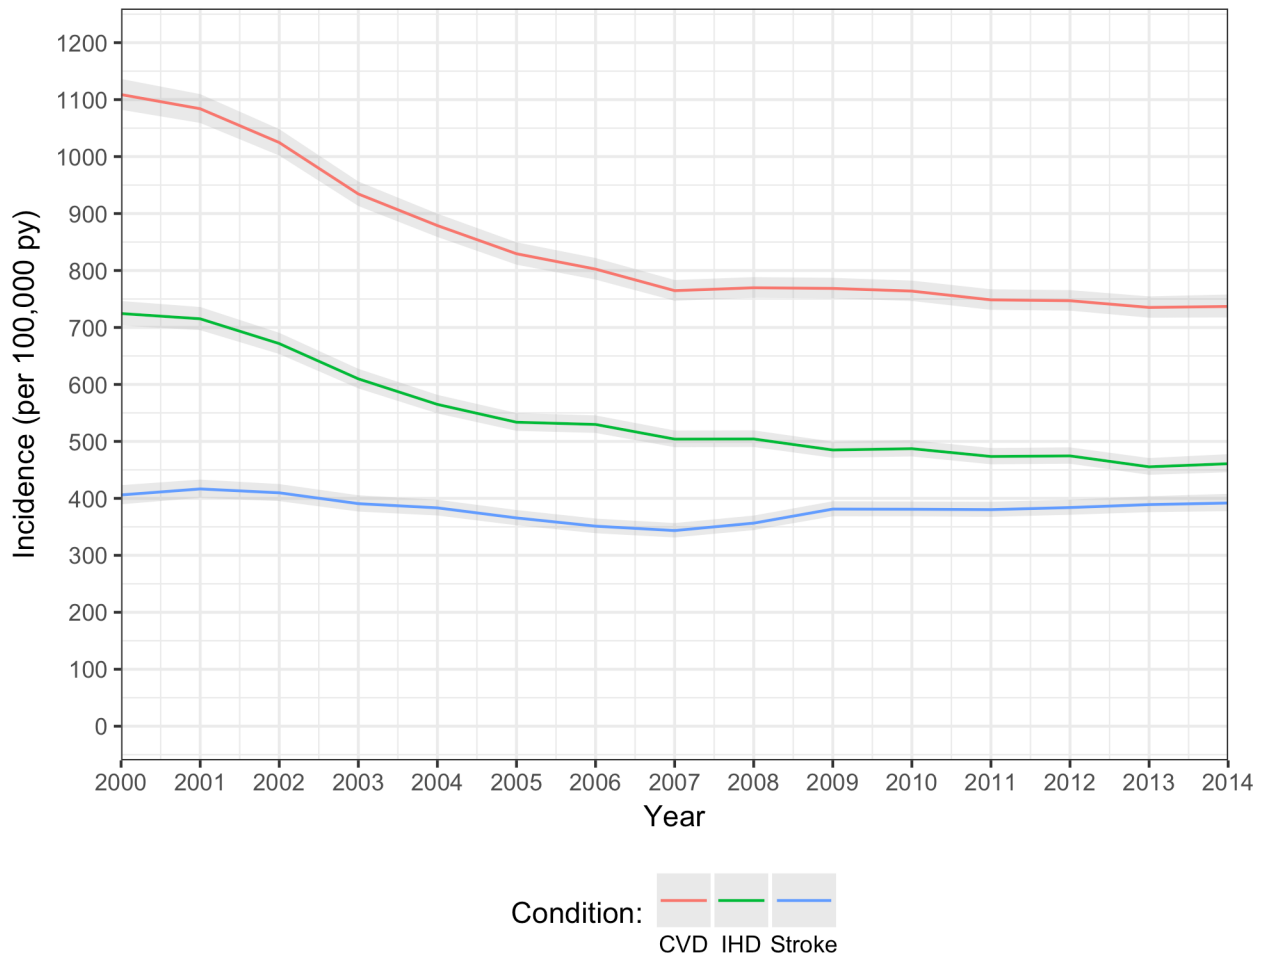

**Fig 1. Annual age/sex-standardised incidence of CVD, IHD, and stroke/TIA.** Overall CVD (red line); IHD (including acute myocardial infarction and angina; green line); stroke/TIA (blue line). CVD, cardiovascular disease; IHD, ischaemic heart disease; TIA, transient ischaemic attack.

<https://doi.org/10.1371/journal.pmed.1002513.g001>

comorbidities, crude and age/sex-standardised prevalence of number of comorbidities increased up to the maximum observed value of 17 comorbidities in any 1 patient.

Among incident CVD patients, older age groups tended to have higher proportions of multiple comorbidities than younger age groups (Fig 3). In people who were  $\geq 90$  years, the sex-standardised prevalence of having 5 or more comorbidities was 6.9 times the prevalence of having no comorbidities (32.7% [95% CI 31.7%–34.0%] and 4.8% [3.6%–5.9%], respectively), whilst this pattern was reversed in people who were  $< 20$  years, where the sex-standardised prevalence of having no comorbidities was 5.6 times the prevalence of having 5 or more comorbidities (40.2% [13.0%–75.3%] and 7.1% [0.0%–40.5%], respectively). Patterns in crude prevalence were similar to those of sex-standardised prevalence (S3 Fig).

The age-standardised prevalence of number of comorbidities across the whole study period varied by sex (S4 Fig). The age-standardised prevalence of having 4 or more comorbidities was higher in women, suggesting that the older age of women was not the only reason for the higher burden of comorbidity among them. The age-standardised prevalence of having 5 or more comorbidities was 19.1% (95% CI 17.2%–22.7%) in women and 12.5% (12.0%–13.9%) in men.

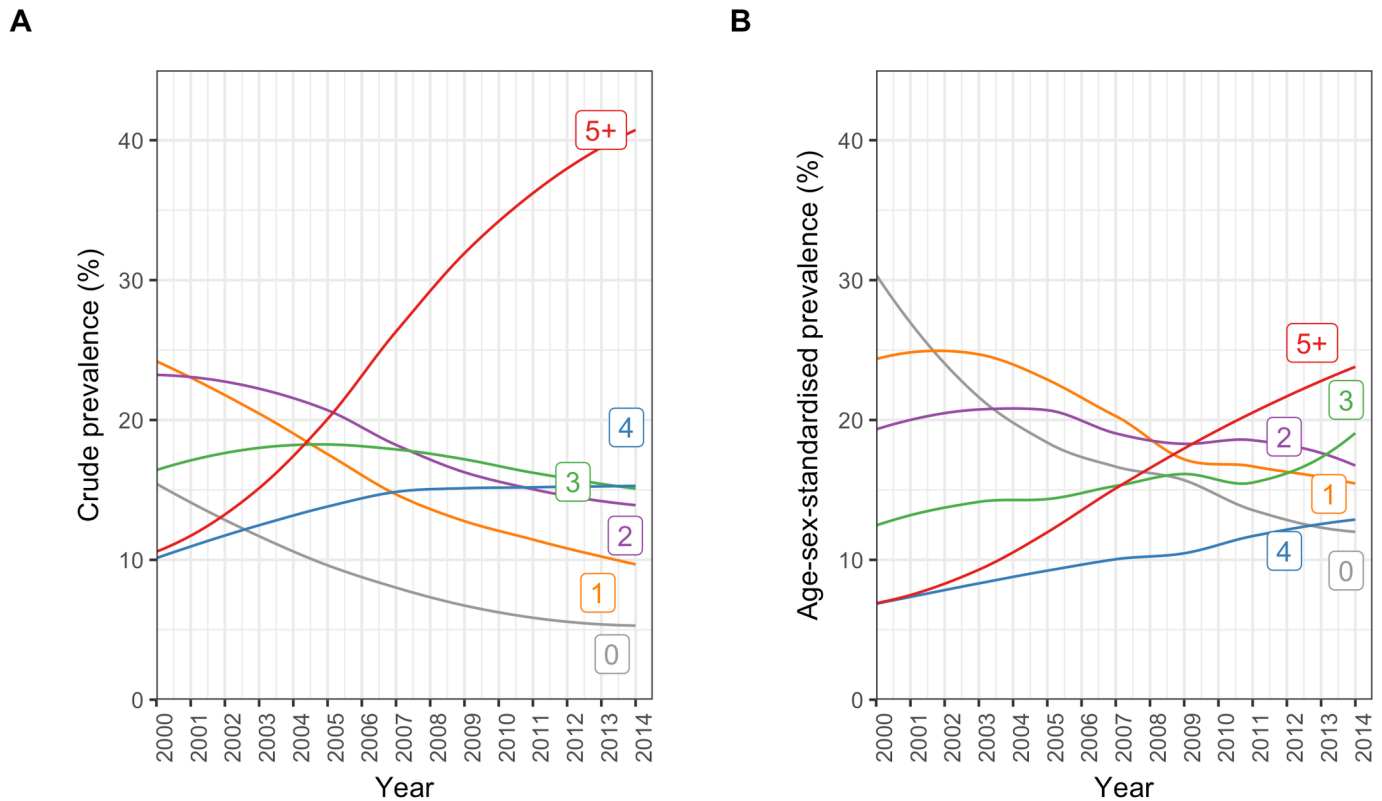

**Fig 2. Annual crude and age/sex-standardised prevalence of number of comorbidities in incident cardiovascular disease patients.** (A) Crude prevalence. (B) Age/sex-standardised prevalence. Number labels for each line refer to the number of comorbidities.

<https://doi.org/10.1371/journal.pmed.1002513.g002>

Fig 4 shows age/sex-standardised prevalence of number of comorbidities comparing patterns among patients by SES group. There was a general pattern of increasing prevalence of higher numbers of comorbidities with increasing deprivation. Those who were socioeconomically more deprived had a higher prevalence of higher numbers of comorbidities, with the age/sex-standardised prevalence of having 5 or more conditions increasing from 12.0% (95% CI 10.7%–19.1%) in the least deprived fifth to 19.9% (18.7%–40.8%) in the most deprived fifth.

### Prevalence of specific comorbidities

The most prevalent comorbidities among all incident CVD patients between 2000 and 2014 were in the condition categories cardiometabolic, mental illness, and musculoskeletal (Table 3). The most prevalent conditions in age/sex-standardised models were hypertension (28.9% [95% CI 27.7%–31.4%]), depression (23.0% [21.3%–26.0%]), arthritis (20.9% [19.5%–23.5%]), asthma (17.7% [15.8%–20.8%]), and anxiety (15.0% [13.7%–17.6%]) (S4 Table).

Annual age/sex-standardised prevalence increased over time for most comorbidities (Fig 5; S4 Table). Many of the highly prevalent comorbidities increased from 2000 to 2014 in age/sex-standardised models, including hypertension, which increased by 11.9% from 32.0% (95% CI 26.9%–45.9%) in 2000 to 35.8% (34.4%–40.1%) in 2014, and depression, which increased by 47.1% from 16.6% (13.8%–30.2%) in 2000 to 24.5% (22.7%–29.0%) in 2014. Of the top 10 comorbidities ranked by age/sex-standardised prevalence, the largest increase between 2000 and 2014 was seen in chronic kidney disease (321.0% increase, 1.6% [95% CI 0.5%–15.5%]) to 6.6% [5.8%–10.6%]), followed by hyperlipidaemia (97.3% increase, 10.5% [8.4%–23.6%]) to

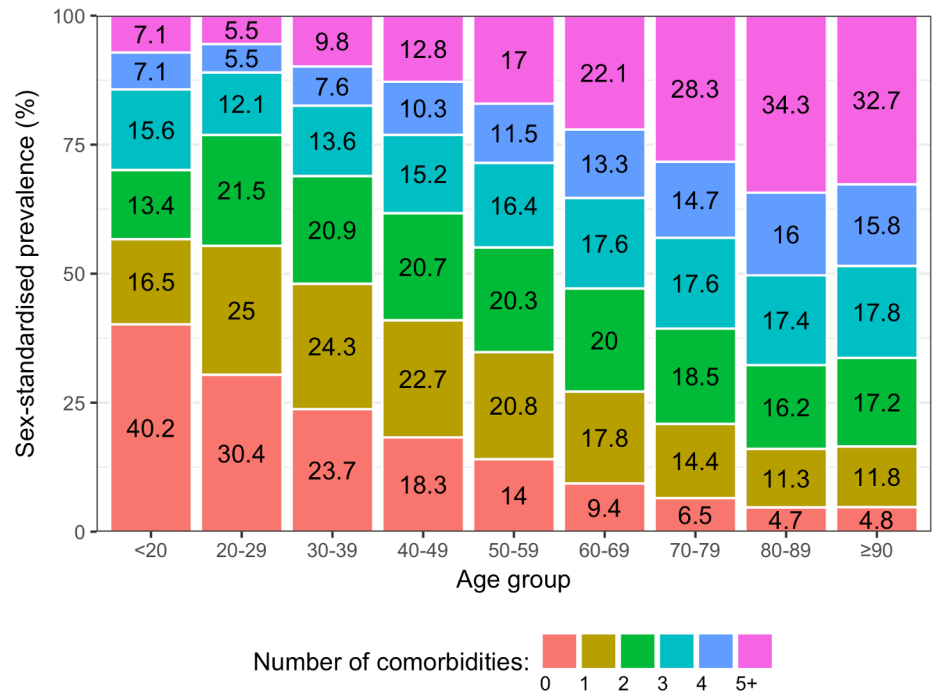

**Fig 3. Sex-standardised prevalence of number of conditions in patients with incident cardiovascular disease by age group (years).**

<https://doi.org/10.1371/journal.pmed.1002513.g003>

20.6% [19.4%–24.6%]) and obesity (94.6% increase, 7.6% [5.8%–21.1%] to 14.9% [13.4%–19.2%]). For some conditions, such as hypertension and arthritis, a peak in prevalence was seen in 2007. To investigate whether the increase in prevalence of conditions was due to the introduction of QOF, we stratified results by QOF and non-QOF conditions (S5 Fig); the majority of conditions in both groups had generally increasing prevalence over time.

The age-specific prevalence of comorbidities stratified by 10-year age groups is shown in Fig 6. There was an age-specific pattern of comorbidities, with a high prevalence of cardiometabolic conditions and arthritis in older age groups, and a high prevalence of mental illness in younger age groups (Table 4). Hypertension had the highest prevalence in 80–89 year olds (62.7% [95% CI 62.3%–63.1%]), depression had highest prevalence in 30–39 year olds (27.6% [26.1%–29.2%]), and anxiety had the highest prevalence in 40–49 year olds (17.3% [16.7%–17.9%]). Table 4 shows the top 10 most prevalent comorbidities by sex-standardised prevalence in each age group. Cardiometabolic conditions were highly prevalent in all age groups, but even more so among older age groups. Hypertension was the most prevalent comorbidity in patients ≥40 years and increased with age; the prevalence in 40–49 year olds (31.5% [95% CI 30.8%–32.3%]) was half that of 80–89 year olds (62.7% [62.3%–63.1%]). Arthritis also increased in prevalence with age and was ranked higher in older age groups, rising from ninth in 30–39 year olds (8.0% [95% CI 7.1%–9.0%]) to the second most prevalent comorbidity by age 60–69 years (34.8% [34.4%–35.2%]), and maintaining second place until age ≥90 years (53.5% [52.7%–54.2%]). Mental illnesses were highly ranked in younger age groups, with depression being the most prevalent comorbidity in 30–39 year olds (27.6% [95% CI 26.1%–29.2%]) and reducing in prevalence to rank eighth by age ≥90 years (15.1% [14.6%–15.7%]).

Women had higher age-standardised prevalence of most comorbidities compared to men (Fig 7). The top 5 conditions in women by age-standardised prevalence were hypertension (31.3% [95% CI 29.4%–35.0%]), depression (31.1% [28.3%–35.5%]), arthritis (24.3% [22.5%–

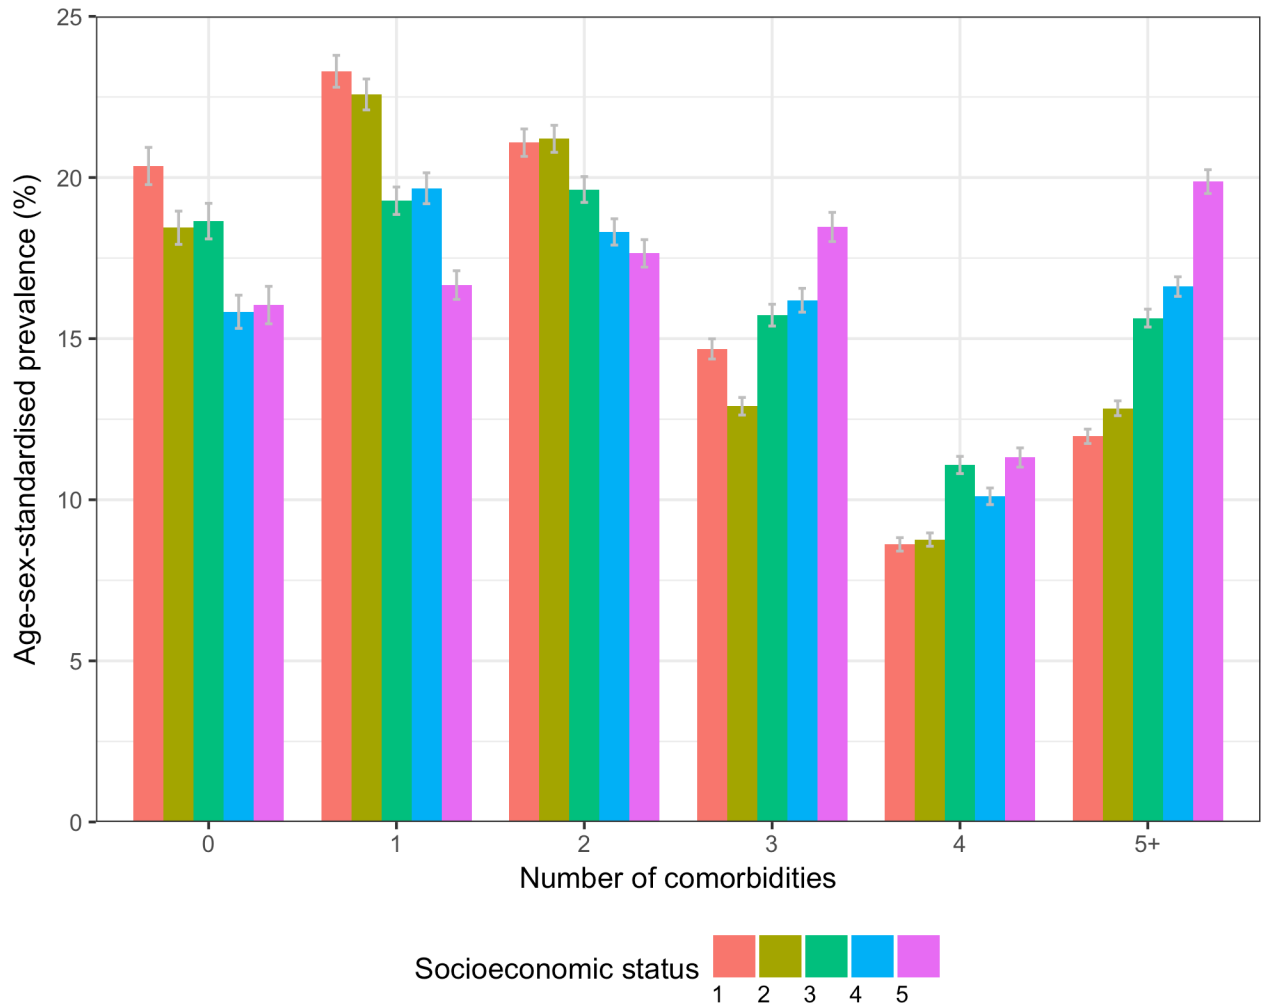

**Fig 4. Age/sex-standardised prevalence of number of comorbidities in patients with incident cardiovascular disease by socioeconomic status.** Socioeconomic status is split by quintiles of the Index of Multiple Deprivation for 2015, where 1 = the least deprived fifth, and 5 = the most deprived fifth.

<https://doi.org/10.1371/journal.pmed.1002513.g004>

28.0%)), asthma (20.5% [18.4%–24.3%]), and anxiety (19.6% [17.6%–23.3%]). In men, the top 5 conditions were hypertension (26.5% [95% CI 26.1%–27.9%]), arthritis (17.4% [16.5%–19.0%]), depression (15.0% [14.3%–16.5%]), asthma (14.9% [13.1%–17.3%]), and hyperlipidaemia (11.5% [10.7%–13.1%]). Out of the top 10 most prevalent comorbidities, ranked by overall age/sex-standardised prevalence for 2000–2014, the largest sex difference was for depression and anxiety: women’s age-standardised prevalence was 2.1 times that of men for depression (31.1% [95% CI 28.3%–35.5%] versus 15.0% [14.3%–16.5%]) and 1.9 times that of men for anxiety (19.6% [17.6%–23.3%] versus 10.4% [9.8%–11.8%]).

For all comorbidities in the top 10, patients in the most deprived fifth of SES had a higher prevalence than those in the least deprived fifth (S6 Fig). The largest difference between the most and least deprived fifths in age/sex-standardised models for the top 10 comorbidities was for depression, with a prevalence 46% higher in the most deprived fifth compared to the least deprived fifth (38.4% [95% CI 31.2%–62.0%] versus 26.3% [23.1%–34.5%]), followed by diabetes, with a prevalence 45% higher in the most deprived fifth compared to the least deprived fifth (22.6% [21.2%–43.4%] versus 15.6% [14.3%–22.7%]). The ranking of the most common

**Table 3. Age/sex-standardised prevalence of comorbidities in patients with incident cardiovascular disease (*n* = 229,205).**

| Comorbidity                           | <i>N</i> | Age/sex-standardised prevalence, percent (95% CI) |
|---------------------------------------|----------|---------------------------------------------------|
| Hypertension                          | 109,365  | 28.9 (27.7–31.5)                                  |
| Depression                            | 42,973   | 23.0 (21.3–26.0)                                  |
| Arthritis                             | 85,527   | 20.9 (19.5–23.5)                                  |
| Asthma                                | 31,103   | 17.7 (15.8–20.8)                                  |
| Anxiety                               | 30,255   | 15.0 (13.7–17.6)                                  |
| Hyperlipidaemia                       | 35,304   | 11.3 (10.7–13.6)                                  |
| Diabetes mellitus                     | 33,307   | 11.2 (10.1–13.7)                                  |
| Obesity                               | 22,315   | 10.8 (10.2–12.9)                                  |
| Cardiac arrhythmia                    | 27,695   | 7.1 (6.0–9.6)                                     |
| Chronic kidney disease                | 24,314   | 5.3 (4.9–7.4)                                     |
| Substance abuse                       | 6,768    | 5.1 (4.6–7.4)                                     |
| Chronic obstructive pulmonary disease | 20,363   | 4.5 (4.3–6.6)                                     |
| Adjustment disorder                   | 5,077    | 4.4 (2.8–7.5)                                     |
| Heart failure                         | 19,090   | 4.1 (3.8–6.3)                                     |
| Peripheral arterial disease           | 16,522   | 3.9 (3.6–6.0)                                     |
| Epilepsy                              | 5,057    | 3.6 (3.0–6.0)                                     |
| Gout                                  | 14,255   | 3.4 (3.2–5.6)                                     |
| Peptic ulcer disease                  | 13,249   | 3.4 (3.2–5.5)                                     |
| Other female reproductive cancer      | 2,346    | 3.2 (1.6–7.1)                                     |
| Osteoporosis                          | 15,655   | 2.9 (2.5–5.2)                                     |

The top 20 comorbidities ranked by age/sex-standardised prevalence are shown.

<https://doi.org/10.1371/journal.pmed.1002513.t003>

comorbidities across the five SES groups was similar; a combination of hypertension, hyperlipidaemia, arthritis, depression, cardiac arrhythmia, and/or anxiety made up the top 5 comorbidities across each fifth of deprivation index.

## Discussion

In a representative population of 4.2 million UK adults, we identified 229,205 incident cases of non-fatal CVD, and measured the prevalence of 56 major comorbidities prior to CVD diagnosis. We observed that while age/sex-standardised incidence of non-fatal CVD decreased by a third between 2000 and 2014, the burden of multimorbidity and comorbidity increased. Although part of the increase was accounted for by an ageing population, even in age/sex-standardised analyses, the prevalence of having 5 or more comorbidities increased by 4 times, from 6.3% to 24.3%, between 2000 and 2014. The patterns of comorbidities differed substantially by age, sex, and SES. On average, older patients, women, and socioeconomically deprived groups had higher numbers of comorbidities, but the type of comorbidities differed by age and sex.

Most of the increased burden of comorbidity was in concordant cardiometabolic comorbidities such as hypertension, diabetes, and obesity, which are known to cluster together in the general population [30]. However, there was also a large burden of comorbidities that were discordant with CVD, such as arthritis, asthma, and mental illness (depression and anxiety), which are not perceived to share pathophysiological pathways [31]. On average, in the whole population of incident CVD cases, 4 out of the 10 top comorbidities were non-cardiometabolic.

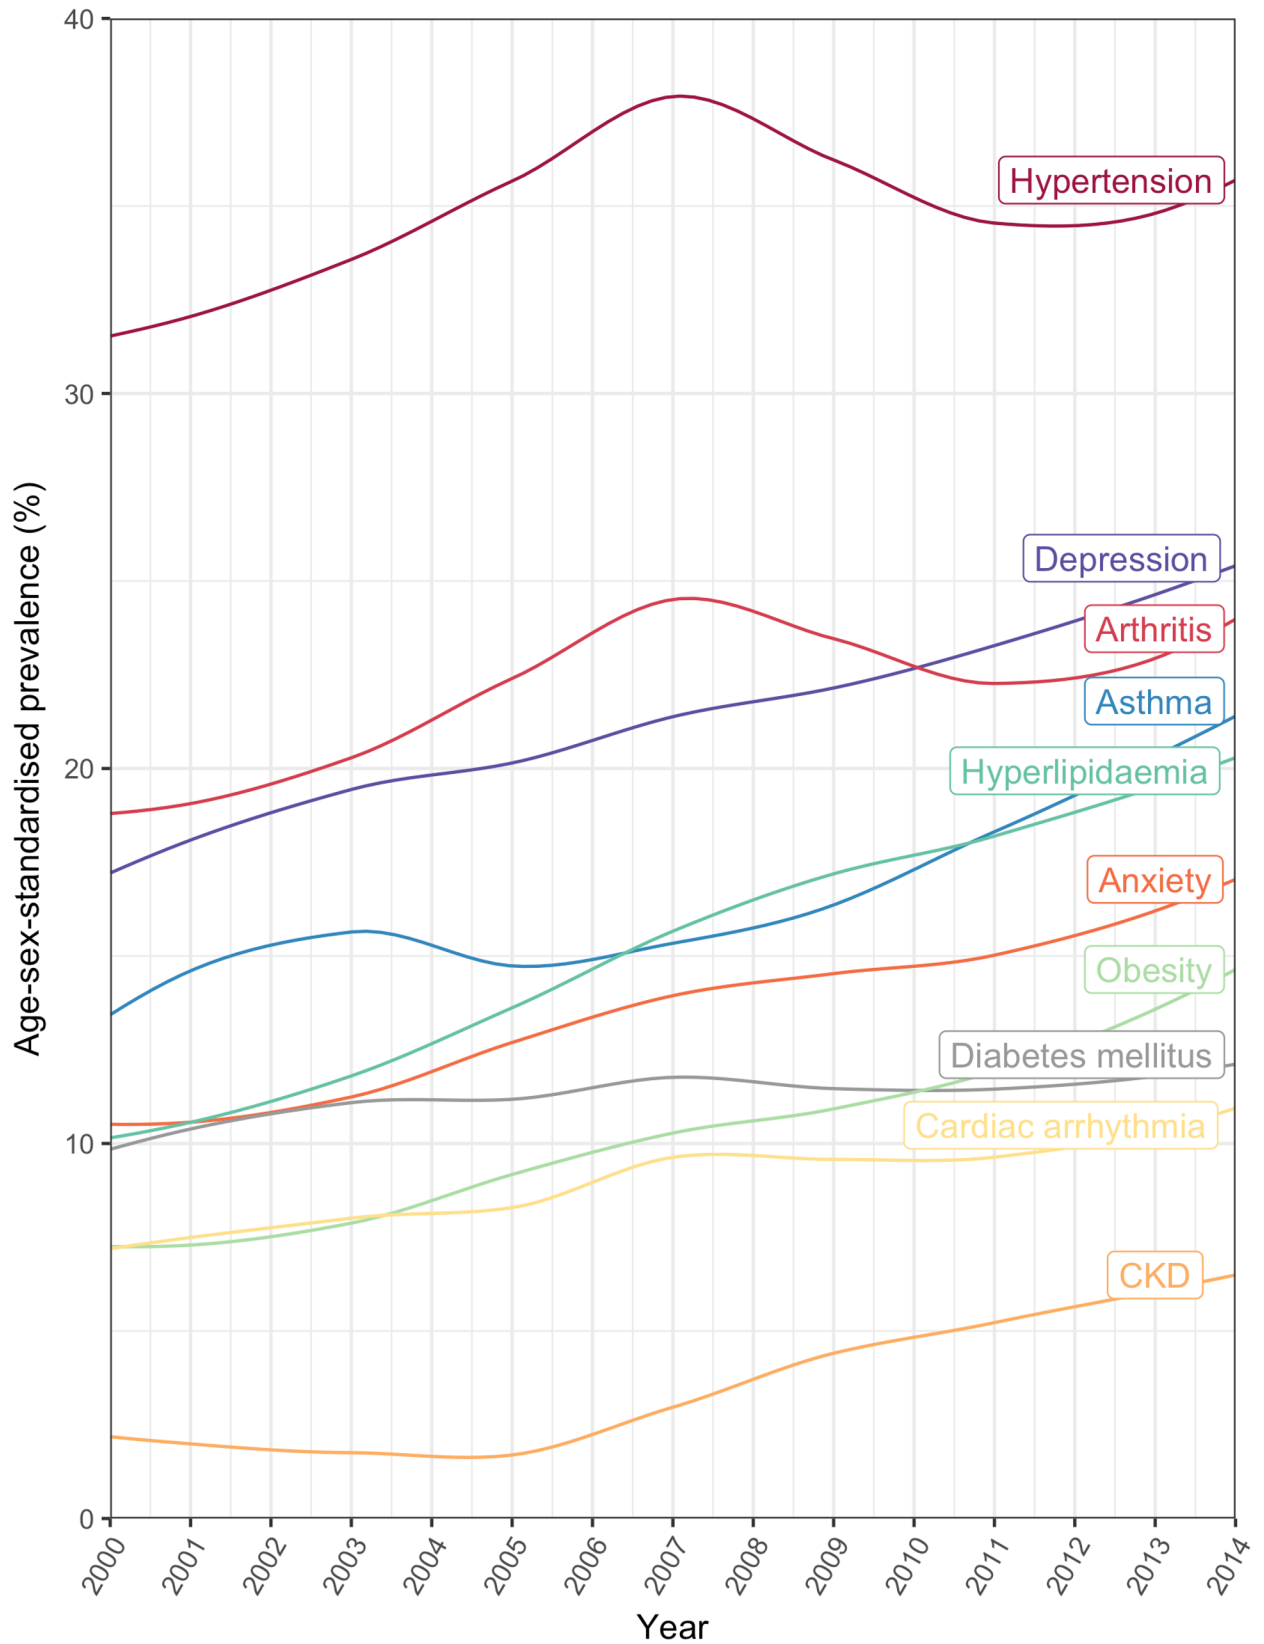

Fig 5. Annual prevalence of the 10 most common comorbidities in patients with incident cardiovascular disease between 2000 and 2014. CKD, chronic kidney disease.

<https://doi.org/10.1371/journal.pmed.1002513.g005>

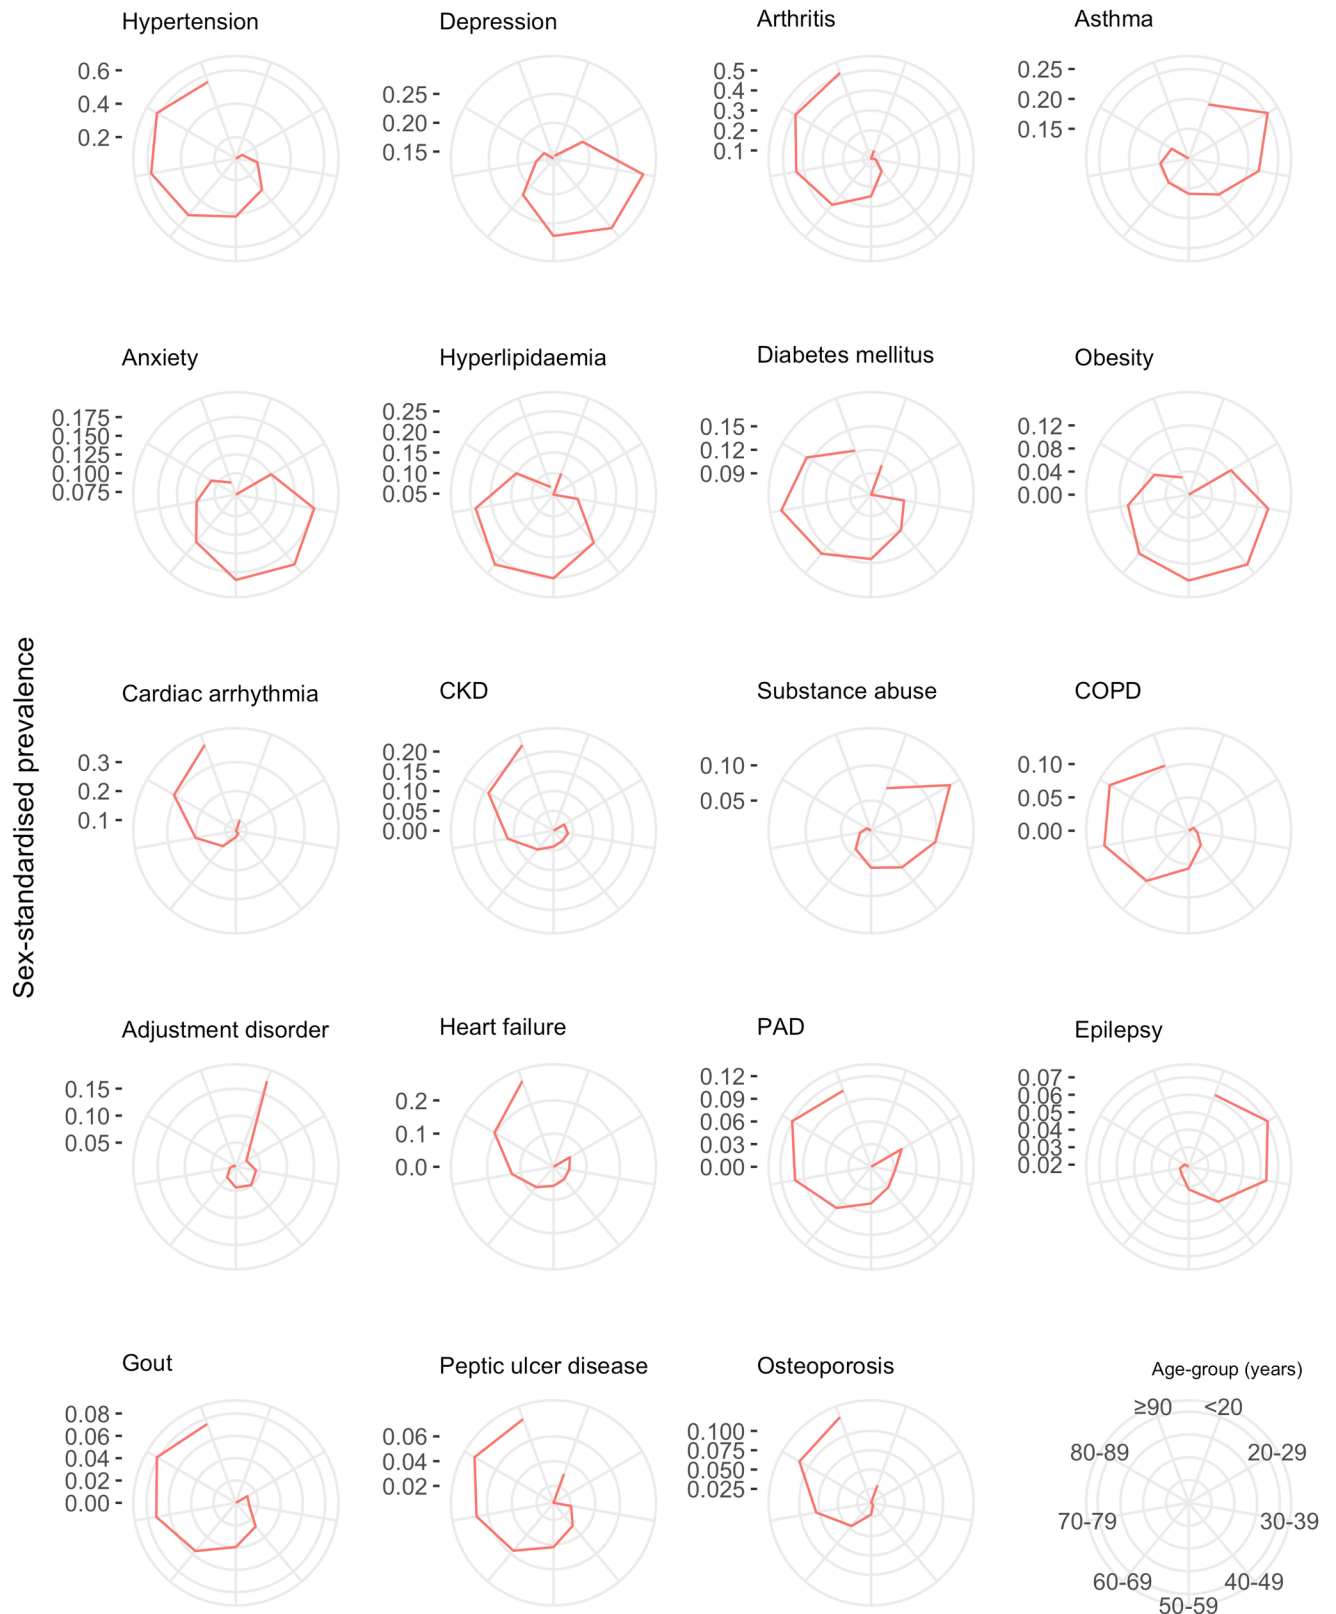

**Fig 6. Sex-standardised prevalence of comorbidities in patients with incident cardiovascular disease by age group (years).** The spokes of each radial plot represent increasingly older age groups going clockwise from the first spoke after 12 o'clock (legend represented in bottom right of figure). The

diameter axes show sex-standardised prevalence, and axis ticks/scale are specifically labelled for each plot. The most prevalent non-sex-specific conditions are shown. CKD, chronic kidney disease; COPD, chronic obstructive pulmonary disease; PAD, peripheral arterial disease.

<https://doi.org/10.1371/journal.pmed.1002513.g006>

The high prevalence of discordant comorbidities, such as arthritis, might be due to co-occurrence of common diseases in older populations. However, this does not explain the high prevalence of conditions such as mental illnesses, which were very common in younger patients. For instance, in those aged 40 to 49 years and 50 to 59 years, depression was ranked the second and third most common comorbidity, respectively, and affected about a quarter of these patients. Indirect comparisons with reports from the general UK population suggest that there is an excess of such conditions in those with incident CVD [32,33]. Consistent with our findings, a recent study using the CPRD showed that both prevalent and newly diagnosed depression was associated with cardiac, cerebrovascular, and peripheral arterial diseases [32]. However, this pattern is not confined to CVD; studies have shown that 25% of patients with a chronic medical condition have comorbid depression, and about double the prevalence or odds of depression compared to those without any chronic conditions [33]. The high prevalence of discordant comorbidities in patients with CVD suggests that the co-occurrence of some of them might not be due to chance alone: perhaps common aetiologies or shared risk factors, such as social stress and inflammation [23,34], could play a role in developing multimorbidity and influencing the specific comorbidity pattern in patients with CVD.

Our study furthers previous reports of the relationship between age and prevalence of multimorbidity [23]. In particular, we show that CVD patients have a very high prevalence of cardiometabolic comorbidity, with the majority of the top 10 comorbidities in all age groups being cardiometabolic conditions, a pattern that was also shown in patients with prevalent CVD in the US Medicare population [8]. The variation in comorbidity pattern across different age groups calls for research into age-specific comorbidity management in CVD, especially for mental illness in those aged 30–59 years, where about one-quarter of CVD patients were affected.

The increase in comorbid burden over time from 2000 to 2014 is partly explained by increased life expectancy and an ageing population [35]. However, in our analysis the relative increase in prevalence of multiple chronic conditions was similar when models were standardised for age. This suggests that age has not been the key driver of the increasing burden. Alternative explanations include changes in lifestyle factors such as smoking, physical inactivity, and diet, which have been identified as contributors to the development of chronic conditions and multimorbidity [36]. Health-system-related factors, such as changes in policies for better diagnosis, improved medical technologies, and more accessible health care, might have also contributed to the increased burden. Other explanations relate to patient factors, such as increased health literacy and health-seeking behaviour, leading to increased subsequent diagnoses.

Women with CVD had higher age-standardised prevalence of higher numbers of comorbidities, and of most individual comorbidities. The sex difference was maintained in most cardiometabolic conditions, despite the higher prevalence of cardiovascular risk factors in men at the time of diagnosis of CVD. There were particularly noticeable sex differences for depression and anxiety, where women had a prevalence about 1.5 times that of men. The sex difference in the prevalence of multimorbidity and physical/mental comorbidity has been identified in the general population [37]. The persistence of this sex difference in CVD patients suggests that although men are more likely to develop CVD, women are more likely to have a higher burden of comorbidities, including discordant comorbidities, that could potentially affect CVD management and outcomes.



**Table 4. Age-specific ranking of the top 10 most prevalent comorbidities.**

| Ranking | Age group (years)   |       |                    |       |                    |       |                    |       |                    |      |                    |      |                        |      |                        |      |
|---------|---------------------|-------|--------------------|-------|--------------------|-------|--------------------|-------|--------------------|------|--------------------|------|------------------------|------|------------------------|------|
|         | <20                 | 20–29 | 30–39              | 40–49 | 50–59              | 60–69 | 70–79              | 80–89 | >90                |      |                    |      |                        |      |                        |      |
| 1       | Asthma              | 21.7  | 25.1               | 27.6  | Hypertension       | 31.5  | Hypertension       | 41.4  | Hypertension       | 50.9 | Hypertension       | 58.6 | Hypertension           | 62.7 | Hypertension           | 58.3 |
| 2       | Learning disability | 17.4  | 19.1               | 20.8  | Depression         | 26.5  | Depression         | 25.4  | Arthritis          | 34.8 | Arthritis          | 43.8 | Arthritis              | 50.7 | Arthritis              | 53.5 |
| 3       | Adjustment disorder | 13.0  | Substance abuse    | 14.5  | Hypertension       | 21.0  | Hyperlipidaemia    | 24.3  | Depression         | 26.8 | Hyperlipidaemia    | 24.0 | Cardiac arrhythmia     | 30.5 | Cardiac arrhythmia     | 36.9 |
| 4       | Cardiac arrhythmia  | 8.7   | Anxiety            | 12.4  | Anxiety            | 17.3  | Anxiety            | 23.1  | Arthritis          | 20.5 | Depression         | 20.4 | Heart failure          | 20.4 | Heart failure          | 27.4 |
| 5       | Diabetes mellitus   | 8.7   | Hypertension       | 11.4  | Obesity            | 13.3  | Asthma             | 16.7  | Anxiety            | 16.3 | Diabetes mellitus  | 17.9 | Chronic kidney disease | 18.9 | Chronic kidney disease | 22.2 |
| 6       | Arthritis           | 8.7   | Obesity            | 8.3   | Hyperlipidaemia    | 11.5  | Obesity            | 14.6  | Diabetes mellitus  | 14.5 | Asthma             | 16.8 | Depression             | 16.7 | Dementia               | 18.6 |
| 7       | Hemiplegia          | 8.7   | Epilepsy           | 7.1   | Substance abuse    | 10.8  | Arthritis          | 13.2  | Asthma             | 14.4 | Anxiety            | 14.8 | Hyperlipidaemia        | 15.5 | Osteoporosis           | 15.9 |
| 8       | Epilepsy            | 8.7   | Cardiac arrhythmia | 6.5   | Diabetes mellitus  | 10.3  | Diabetes mellitus  | 12.1  | Obesity            | 13.9 | Cardiac arrhythmia | 12.9 | Diabetes mellitus      | 15.4 | Depression             | 15.1 |
| 9       | Depression          | 8.7   | Diabetes mellitus  | 6.2   | Arthritis          | 8.0   | Substance abuse    | 8.1   | Cardiac arrhythmia | 8.7  | Obesity            | 12.7 | Asthma                 | 13.3 | Diabetes mellitus      | 11.4 |
| 10      | Hyperlipidaemia     | 8.7   | Heart failure      | 5.9   | Cardiac arrhythmia | 6.4   | Cardiac arrhythmia | 7.6   | Substance abuse    | 6.4  | COPD               | 12.4 | COPD                   | 13.0 | Anxiety                | 10.1 |

Sex-standardised prevalence (%) is listed to the right of each condition listed. Shading is as follows: cardiometabolic conditions, red; respiratory conditions, green; mental health conditions, yellow; neurological conditions, blue; and musculoskeletal conditions, purple.

COPD, chronic obstructive pulmonary disease.

<https://doi.org/10.1371/journal.pmed.1002513.t004>

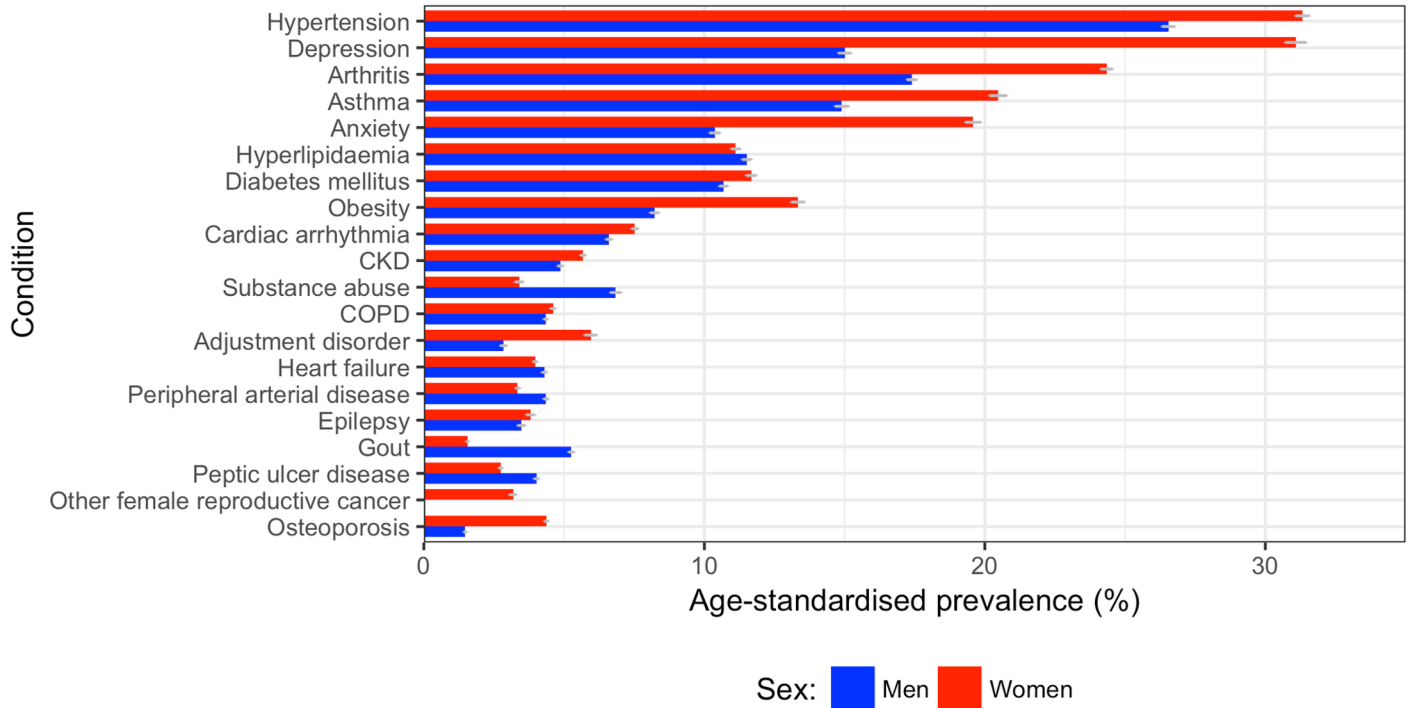

**Fig 7. Age-standardised prevalence of comorbidities in women and men.** The top 20 comorbidities ranked by sex-specific age-standardised prevalence between 2000 and 2014 are shown for men (blue) and women (red). CKD, chronic kidney disease; COPD, chronic obstructive pulmonary disease; PAD, peripheral arterial disease.

<https://doi.org/10.1371/journal.pmed.1002513.g007>

Our study reinforces that CVD patients who are more socioeconomically deprived have a higher prevalence of more comorbidities. One-fifth of patients in the most deprived fifth had 5 or more comorbidities, compared to the same fraction of people in the least deprived 80% of the population having 1 comorbidity. The comorbidity pattern did not vary much between categories of deprivation for the most common comorbidities, suggesting that those who are more deprived are diagnosed with more of the most common comorbidities including hypertension, depression, and arthritis. The socioeconomic gradient of multimorbidity has been reported previously, including in a nationally representative primary care population of 1.7 million in Scotland [23], but, to our knowledge, the socioeconomic gradient with multimorbidity has not been examined in patients with CVD.

One strength of our study is the use of a large representative cohort across primary and secondary care in the UK that provides sufficient power to analyse overall prevalence of multimorbidity and individual comorbidities, as well as prevalence in subpopulations by age, sex, and SES. As such, the findings are likely to be of direct relevance to several other developed nations with a similar profile of CVD incidence. Our reported non-fatal CVD incidences over time are consistent with previous studies showing a one-third reduction in CVD over a similar period [38,39]. The longitudinal nature of our data has also allowed analysis of temporal trends, which have not been investigated previously for multimorbidity and comorbidity in CVD patients in the general population [9,40]. We also selected a population with incident diagnosis of CVD. This reduces the risk of diagnosis-time-dependent differences between CVD patients, such as survival time and severity of disease, and enables better comparisons of patients over time and by important features.

A limitation of using electronic health records is the dependence on recorded diagnoses, and hence lack of inclusion of undiagnosed cases or those with no contact with healthcare

services, which could lead to underestimation of actual prevalences in the general population. Some of the patterns we see over time could be an artefact of recording bias or incentives, such as the QOF, which was introduced in 2004 [18]. In our study, QOF conditions did not seem to consistently peak in prevalence around 2004, nor did QOF conditions increase after 2004 when compared to non-QOF conditions, which would be expected if QOF incentives were a major driver of increased recorded diagnoses. Furthermore, there has been much investigation into the validity of diagnoses recorded by general practitioners in CPRD for a range of comorbidities, and the average positive predictive value is 89%, with 92% completeness when compared to national registries [41]. In addition, from a policy perspective, diagnoses recorded in health records are likely to be of higher relevance than routine population screening, because the former remain the basis for service planning and payment.

There is no common framework for selecting conditions for defining multimorbidity, and we used 3 different sources to collate a list of clinically relevant and common chronic conditions. This list includes the CVD risk factors hypertension, hyperlipidaemia, and obesity, which a large number of CVD patients develop before incident CVD. Our prevalences over time show that the increasing multimorbidity burden is unlikely to be attributable to these 3 conditions alone; the proportion of people who had 5 or more comorbidities increased 4-fold between 2000 and 2014, and the proportion with hypertension only increased by 11.9% between 2000 and 2014, which was one of the lower percentage increases amongst the top 10 most prevalent comorbidities.

Our descriptive study of 56 prevalent comorbidities in incident CVD is important in informing policy and research to guide clinical care. Multimorbidity has already been shown to associate with higher healthcare use, increased disability and mortality, and lower quality of life [35], and is associated with SES, age, and mental illness [23] in the general population. Our work quantifies the high and substantially increasing number of comorbidities in patients at the time of first CVD diagnosis, and also highlights the spectrum of disorders in the comorbidity burden, with 4 of the top 10 most prevalent conditions being non-cardiometabolic. These findings emphasise the need for more integrated models of care and challenges guidelines to better address the issue of management in the presence of several types of comorbidities. Future research investigating the role of stratified management of patients with different types of comorbidities is needed.

The current paradigm in CVD practice and policy is single-disease focused, where each cardiovascular condition is considered separately, with little reference to other conditions that potentially affect CVD prevention, risk stratification, and treatment. Although this approach may work well for related conditions, such as hypertension, heart failure, and diabetes, it does not account for discordant comorbidities. Some studies have suggested that focusing on specific problems or clusters, instead of clinical management of specific diseases, may be more effective for patients with multimorbidity [42]. Our study shows that there is a large burden of non-cardiometabolic comorbidity in CVD patients, including depression, anxiety, and asthma, which were all in the top 10 comorbidities out of the 56 comorbidities we studied. The burden and complexity of multimorbidity is increasing in CVD, and practice and policy must change towards more comprehensive CVD and multimorbidity care. In particular, studies that assess the impact of interventions in subgroups of patients with comorbidities could inform a more integrated approach to chronic disease management.

In conclusion, we found that the burden of multimorbidity and comorbidity in incident non-fatal CVD increased over time from 2000 to 2014. On average, older patients, women, and socially deprived groups had higher numbers of comorbidities, but the type of comorbidities varied by age and sex. Cardiometabolic conditions contributed substantially to the burden, but 4 out of the 10 top comorbidities were non-cardiometabolic. Our research shows that the

high and substantially growing numbers of comorbidities require a reassessment of the current single-disease paradigm in CVD research and practice.

## Supporting information

**S1 Fig. Frequency of patients with incident CVD between 2000 and 2014 by age group (years).**

(TIF)

**S2 Fig. Annual age-standardised incidence of CVD, IHD, and stroke/TIA in women and men.**

(TIF)

**S3 Fig. Crude prevalence of numbers of comorbidities by age group (years).**

(TIF)

**S4 Fig. Age-standardised prevalence of number of comorbidities in women and men with incident CVD.**

(TIF)

**S5 Fig. Comparing QOF and non-QOF conditions in the 10 most common comorbidities by annual prevalence in patients with incident CVD between 2000 and 2014.**

(TIF)

**S6 Fig. Age/sex-standardised prevalence of comorbidities by SES group.**

(TIF)

**S1 Table. ICD-10 diagnostic codes for CVD and the 56 conditions included as comorbidities and in count of numbers of conditions.**

(DOCX)

**S2 Table. Age of male and female CVD patients at time of diagnosis each calendar year.**

(DOCX)

**S3 Table. Prevalence of number of conditions.**

(DOCX)

**S4 Table. Prevalence of specific comorbidities.**

(DOCX)

**S1 Text. Study protocol.**

(DOCX)

**S2 Text. RECORD guidelines.**

(DOCX)

## Author Contributions

**Conceptualization:** Jenny Tran, Robyn Norton, Kazem Rahimi.

**Data curation:** Jenny Tran, Fatemeh Rahimian, Kazem Rahimi.

**Formal analysis:** Jenny Tran.

**Investigation:** Jenny Tran.

**Methodology:** Jenny Tran, Nathalie Conrad, Dexter Canoy, Milad Nazarzadeh, Kazem Rahimi.

**Supervision:** Robyn Norton, Kazem Rahimi.

**Visualization:** Jenny Tran.

**Writing – original draft:** Jenny Tran.

**Writing – review & editing:** Jenny Tran, Robyn Norton, Nathalie Conrad, Fatemeh Rahimian, Dexter Canoy, Milad Nazarzadeh, Kazem Rahimi.

## References

- de Groot V, Beckerman H, Lankhorst GJ, Bouter LM. How to measure comorbidity. a critical review of available methods. *J Clin Epidemiol*. 2003; 56(3):221–9. [https://doi.org/10.1016/S0895-4356\(02\)00585-1](https://doi.org/10.1016/S0895-4356(02)00585-1) PMID: 12725876
- Glynn LG, Valderas JM, Healy P, Burke E, Newell J, Gillespie P. The prevalence of multimorbidity in primary care and its effect on health care utilization and cost. *Fam Pract*. 2011; 28(5):516–23. <https://doi.org/10.1093/fampra/cmr013> PMID: 21436204
- Palladino R. Associations between multimorbidity, healthcare utilisation and health status: evidence from 16 European countries. *Age Ageing*. 2016; 45(3):431–5. <https://doi.org/10.1093/ageing/afw044> PMID: 27013499
- Murray CJL, Vos T, Lozano R, Naghavi M, Flaxman AD, Michaud C, et al. Disability-adjusted life years (DALYs) for 291 diseases and injuries in 21 regions, 1990–2010: a systematic analysis for the Global Burden of Disease Study 2010. *Lancet*. 2012; 380(9859):2197–223. [https://doi.org/10.1016/S0140-6736\(12\)61689-4](https://doi.org/10.1016/S0140-6736(12)61689-4) PMID: 23245608
- Diederichs C, Berger K, Bartels DB. The measurement of multiple chronic diseases—a systematic review on existing multimorbidity indices. *J Gerontol A Biol Sci Med Sci*. 2011; 66(3):301–11. <https://doi.org/10.1093/gerona/gjq208> PMID: 21112963
- Dunlay SM, Chamberlain AM. Multimorbidity in older patients with cardiovascular disease. *Curr Cardiovasc Risk Rep*. 2016; 10:3. <https://doi.org/10.1007/s12170-016-0491-8> PMID: 27274775
- Fillenbaum GG, Pieper CF, Cohen HJ, Cornoni-Huntley JC, Guralnik JM. Comorbidity of five chronic health conditions in elderly community residents: determinants and impact on mortality. *J Gerontol A Biol Sci Med Sci*. 2000; 55(2):M84–9. PMID: 10737690
- Arnett DK, Goodman RA, Halperin JL, Anderson JL, Parekh AK, Zoghbi WA. AHA/ACC/HHS strategies to enhance application of clinical practice guidelines in patients with cardiovascular disease and comorbid conditions: from the American Heart Association, American College of Cardiology, and U.S. Department of Health and Human Services. *J Am Coll Cardiol*. 2014; 64(17):1851–6. <https://doi.org/10.1016/j.jacc.2014.07.012> PMID: 25219921
- Bell SP, Saraf AA. Epidemiology of multimorbidity in older adults with cardiovascular disease. *Clin Geriatr Med*. 2016; 32(2):215–26. <https://doi.org/10.1016/j.cger.2016.01.013> PMID: 27113142
- Chen HY, Saczynski JS, McManus DD, Lessard D, Yarzebski J, Lapane KL, et al. The impact of cardiac and noncardiac comorbidities on the short-term outcomes of patients hospitalized with acute myocardial infarction: a population-based perspective. *Clin Epidemiol*. 2013; 5:439–48. <https://doi.org/10.2147/CLEP.S49485> PMID: 24235847
- McManus DD, Nguyen HL, Saczynski JS, Tisminetzky M, Bourell P, Goldberg RJ. Multiple cardiovascular comorbidities and acute myocardial infarction: temporal trends (1990–2007) and impact on death rates at 30 days and 1 year. *Clin Epidemiol*. 2012; 4:115–23. <https://doi.org/10.2147/CLEP.S30883> PMID: 22701091
- Herrett E, Gallagher AM, Bhaskaran K, Forbes H, Mathur R, van Staa T, et al. Data resource profile: Clinical Practice Research Datalink (CPRD). *Int J Epidemiol*. 2015; 44(3):827–36. <https://doi.org/10.1093/ije/dyv098> PMID: 26050254
- Garcia Rodriguez LA, Perez Gutthann S. Use of the UK General Practice Research Database for pharmacoepidemiology. *Br J Clin Pharmacol*. 1998; 45(5):419–25. <https://doi.org/10.1046/j.1365-2125.1998.00701.x> PMID: 9643612
- Khan NF, Harrison SE, Rose PW. Validity of diagnostic coding within the General Practice Research Database: a systematic review. *Br J Gen Pract*. 2010; 60(572):e128–e36. <https://doi.org/10.3399/bjgp10X483562> PMID: 20202356
- Herrett E, Thomas SL, Schoonen WM, Smeeth L, Hall AJ. Validation and validity of diagnoses in the General Practice Research Database: a systematic review. *Br J Clin Pharmacol*. 2010; 69(1):4–14. <https://doi.org/10.1111/j.1365-2125.2009.03537.x> PMID: 20078607

16. Medicines and Healthcare Products Regulatory Agency. Welcome to Clinical Practice Research Database. London: Medicines and Healthcare Products Regulatory Agency; 2017 [cited 2018 Feb 1]. Available from: <https://www.cprd.com/intro.asp>.
17. Lewis JD, Bilker WB, Weinstein RB, Strom BL. The relationship between time since registration and measured incidence rates in the General Practice Research Database. *Pharmacoepidemiol Drug Saf*. 2005; 14(7):443–51. <https://doi.org/10.1002/pds.1115> PMID: 15898131
18. NHS Digital. Quality and Outcomes Framework (QOF). London: NHS Digital; 2015 [cited 2015 Dec 21]. Available from: <http://www.hscic.gov.uk/qof>.
19. Charlson ME, Pompei P, Ales KL, MacKenzie CR. A new method of classifying prognostic comorbidity in longitudinal studies: development and validation. *J Chronic Dis*. 1987; 40(5):373–83. [https://doi.org/10.1016/0021-9681\(87\)90171-8](https://doi.org/10.1016/0021-9681(87)90171-8) PMID: 3558716
20. US Department of Health and Human Services Office of the Assistant Secretary for Health. HHS Initiative on Multiple Chronic Conditions. Washington (DC): US Department of Health and Human Services Office of the Assistant Secretary for Health; 2011 [cited 2018 Feb 1]. Available from: <https://www.hhs.gov/ash/about-ash/multiple-chronic-conditions/index.html>.
21. Denaxas SC, George J, Herrett E, Shah AD, Kalra D, Hingorani AD, et al. Data resource profile: Cardiovascular disease research using linked bespoke studies and electronic health records (CALIBER). *Int J Epidemiol*. 2012; 41(6):1625–38. <https://doi.org/10.1093/ije/dys188> PMID: 23220717
22. Newton JN, Briggs AD, Murray CJ, Dicker D, Foreman KJ, Wang H, et al. Changes in health in England, with analysis by English regions and areas of deprivation, 1990–2013: a systematic analysis for the Global Burden of Disease Study 2013. *Lancet*. 2015; 386(10010):2257–74. [https://doi.org/10.1016/S0140-6736\(15\)00195-6](https://doi.org/10.1016/S0140-6736(15)00195-6) PMID: 26382241
23. Barnett K, Mercer SW, Norbury M, Watt G, Wyke S, Guthrie B. Epidemiology of multimorbidity and implications for health care, research, and medical education: a cross-sectional study. *Lancet*. 2012; 380(9836):37–43. [https://doi.org/10.1016/S0140-6736\(12\)60240-2](https://doi.org/10.1016/S0140-6736(12)60240-2) PMID: 22579043
24. Department for Communities and Local Government. The English Index of Multiple Deprivation 2015: guidance. London: Department for Communities and Local Government; 2015.
25. Eurostat. Revision of the European Standard Population—report of Eurostat’s task force. 2013 edition. Luxembourg: Eurostat; 2013.
26. Rothman K, Greenland S. *Modern epidemiology*. 2nd edition. Philadelphia: Lippincott Williams & Wilkins; 1998.
27. Sison CP, Glaz J. Simultaneous confidence intervals and sample size determination for multinomial proportions. *J Am Stat Assoc*. 1995; 90(429):366–9. <https://doi.org/10.2307/2291162>
28. R Core Team. R: a language and environment for statistical computing. Version 3.3.2. Vienna: R Foundation for Statistical Computing; 2017.
29. Benchimol EI, Smeeth L, Guttman A, Harron K, Moher D, Petersen I, et al. The REporting of studies Conducted using Observational Routinely-collected health Data (RECORD) Statement. *PLOS Med*. 2015; 12(10):e1001885. <https://doi.org/10.1371/journal.pmed.1001885> PMID: 26440803
30. Kirchberger I, Meisinger C, Heier M, Zimmermann A-K, Thorand B, Autenrieth CS, et al. Patterns of multimorbidity in the aged population. Results from the KORA-Age Study. *PLoS ONE*. 2012; 7(1): e30556. <https://doi.org/10.1371/journal.pone.0030556> PMID: 22291986
31. Piette JD, Kerr EA. The impact of comorbid chronic conditions on diabetes care. *Diabetes Care*. 2006; 29(3):725–31. <https://doi.org/10.2337/diacare.29.03.06.dc05-2078> PMID: 16505540
32. Daskalopoulou M, George J, Walters K, Osborn DP, Batty GD, Stogiannis D, et al. Depression as a risk factor for the initial presentation of twelve cardiac, cerebrovascular, and peripheral arterial diseases: data linkage study of 1.9 million women and men. *PLoS ONE*. 2016; 11(4):e0153838. <https://doi.org/10.1371/journal.pone.0153838> PMID: 27105076
33. Moussavi S, Chatterji S, Verdes E, Tandon A, Patel V, Ustun B. Depression, chronic diseases, and decrements in health: results from the World Health Surveys. *Lancet*. 2007; 370(9590):851–8. [https://doi.org/10.1016/S0140-6736\(07\)61415-9](https://doi.org/10.1016/S0140-6736(07)61415-9) PMID: 17826170
34. Friedman EM. Inflammation partially mediates the association of multimorbidity and functional limitations in a national sample of middle-aged and older adults. *J Aging Health*. 27(5):843–63. <https://doi.org/10.1177/0898264315569453> PMID: 25649677
35. Boyd CM, Fortin M. Future of multimorbidity research: how should understanding of multimorbidity inform health system design? *Public Health Rev*. 2010; 32:451–74.
36. Fortin M, Haggerty J, Almirall J, Bouhali T, Sasseville M, Lemieux M. Lifestyle factors and multimorbidity: cross sectional study. *BMC Public Health*. 2014; 14:686. <https://doi.org/10.1186/1471-2458-14-686> PMID: 24996220

37. Abad-Diez JM, Calderon-Larranaga A, Poncel-Falco A, Poblador-Plou B, Calderon-Meza JM, Sicras-Mainar A, et al. Age and gender differences in the prevalence and patterns of multimorbidity in the older population. *BMC Geriatrics*. 2014; 14:75. <https://doi.org/10.1186/1471-2318-14-75> PMID: 24934411
38. Lee S, Shafe ACE, Cowie MR. UK stroke incidence, mortality and cardiovascular risk management 1999–2008: time-trend analysis from the General Practice Research Database. *BMJ Open*. 2011; 1(2): e000269. <https://doi.org/10.1136/bmjopen-2011-000269> PMID: 22021893
39. Smolina K, Wright FL, Rayner M, Goldacre MJ. Determinants of the decline in mortality from acute myocardial infarction in England between 2002 and 2010: linked national database study. *BMJ (Clinical research ed)*. 2012; 344:d8059. <https://doi.org/10.1136/bmj.d8059> PMID: 22279113
40. Gallacher KI, Batty GD, McLean G, Mercer SW, Guthrie B, May CR, et al. Stroke, multimorbidity and polypharmacy in a nationally representative sample of 1,424,378 patients in Scotland: implications for treatment burden. *BMC Med*. 2014; 12(1):151. <https://doi.org/10.1186/s12916-014-0151-0> PMID: 25280748
41. Herrett E, Shah AD, Boggon R, Denaxas S, Smeeth L, van Staa T, et al. Completeness and diagnostic validity of recording acute myocardial infarction events in primary care, hospital care, disease registry, and national mortality records: cohort study. *BMJ*. 2013; 346:f2350. <https://doi.org/10.1136/bmj.f2350> PMID: 23692896
42. Smith SM, Soubhi H, Fortin M, Hudon C, O'Dowd T. Managing patients with multimorbidity: systematic review of interventions in primary care and community settings. *BMJ*. 2012; 345:e5205. <https://doi.org/10.1136/bmj.e5205> PMID: 22945950
